# Supplementary material for: Paired-end sequencing of Fosmid libraries by Illumina
Source: HighWire-hosted journal article supplement (doi:10.1101/gr.138925.112), 2012-07-16
Supplement: Williams_Genome_2012_138925_Supplemental.pdf [file Williams_Genome_2012_138925_Supplemental.pdf]

**SUPPLEMENTAL TABLES AND FIGURES**

**Supplemental Table 1.** Comparison of pFosill vectors. Cloning vectors described in this work are available to academic researchers upon request.

| <b>vector</b>                                             | <b>pFosill-1</b>                              | <b>pFosill-2</b>                              | <b>pFosill-3</b>                       | <b>pFosill-4</b>                       |
|-----------------------------------------------------------|-----------------------------------------------|-----------------------------------------------|----------------------------------------|----------------------------------------|
| ILMN-F sequencing primer                                  | SBS-3                                         | SBS-3                                         | SBS-3                                  | SBS-3                                  |
| ILMN-R sequencing primer                                  | SBS-8                                         | SBS-12                                        | SBS-8                                  | SBS-12                                 |
| Multiplex Fosmid cloning <sup>a</sup>                     | No                                            | No                                            | Yes                                    | Yes                                    |
| Multiplex sequencing <sup>b</sup>                         | No                                            | Yes                                           | No                                     | Yes                                    |
| Useful cloning sites                                      | <i>Eco72I</i>                                 | <i>Eco72I</i>                                 | <i>SapI</i>                            | <i>SapI</i>                            |
| Vector-derived bases at the beginning of sequencing reads | Yes <sup>c</sup>                              | Yes <sup>c</sup>                              | No <sup>d</sup>                        | No <sup>d</sup>                        |
| Optional cloning sites                                    | <i>Bam</i> HI<br><i>Xcm</i> I<br><i>Sph</i> I | <i>Bam</i> HI<br><i>Xcm</i> I<br><i>Sph</i> I | <i>Bam</i> HI                          | <i>Bam</i> HI                          |
| Useful nicking sites                                      | Nb. <i>Bbv</i> CI                             | Nb. <i>Bbv</i> CI                             | Nb. <i>Bbv</i> CI<br>Nt. <i>Bsp</i> QI | Nb. <i>Bbv</i> CI<br>Nt. <i>Bsp</i> QI |
| GenBank accession number                                  | JX069761                                      | JX069762                                      | JX069763                               | JX069764                               |

<sup>a</sup>Inline barcodes introduced by ligating *SapI* adapters to genomic DNA fragments and read at the beginning of each paired-end sequencing read

<sup>b</sup>Barcodes introduced by tailed PCR primers at the end of the Fosill conversion process and read by a dedicated sequencing read away from the insert into the Illumina adapter

<sup>c</sup>Sequencing reads primed with standard Illumina primers start with four constant vector-derived bases. It is advisable to sequence Illumina libraries with such “mono-templates” at reduced cluster densities. Otherwise, the density of fluorescent clusters at the beginning of the read may exceed the limits of the imaging system for distinguishing and locating clusters during the first few sequencing cycles.

<sup>d</sup>Sequencing reads begin with the barcodes. To avoid “mono-template” issues during sequencing it is advisable to use more than one barcode even when multiplexing of the library is not required.

**Supplemental Table 2.** Detailed breakdown of sequencing reads

| Organism:                                         | S. pombe          |             | Human (K-562)     |             |                   |             | Mouse (C57B6J)    |             |
|---------------------------------------------------|-------------------|-------------|-------------------|-------------|-------------------|-------------|-------------------|-------------|
| Estimated size of Fosmid library (million cfu)    | 1.4               |             | 6.6               |             |                   |             | 7.5               |             |
| <i>Fosill</i> library                             | S                 |             | H1                |             | H2                |             | M                 |             |
| Size selection                                    | 1x prep gel       |             | low range         |             | high range        |             | 2x prep gel       |             |
| Illumina GAII lanes                               | 2                 |             | 2                 |             | 2                 |             | 2                 |             |
| Read length (bases)                               | 101               |             | 101               |             | 101               |             | 101               |             |
| <b>Total read pairs</b>                           | <b>63,679,610</b> | <b>100%</b> | <b>46,349,056</b> | <b>100%</b> | <b>13,583,577</b> | <b>100%</b> | <b>23,599,670</b> | <b>100%</b> |
| Unaligned pairs                                   | 42,633,191        | 67%         | 3,979,087         | 9%          | 2,038,668         | 15%         | 2,970,052         | 13%         |
| Only one read aligned                             | 2,246,406         | 4%          | 7,871,684         | 17%         | 1,416,895         | 10%         | 1,298,900         | 6%          |
| Multiple placements                               | 694,036           | 1%          | 621,482           | 1%          | 396,288           | 3%          | 581,726           | 2%          |
| Unambiguously placed pairs                        | 18,105,977        | 28%         | 33,876,803        | 73%         | 9,731,726         | 72%         | 18,748,992        | 79%         |
| <b>Unambiguously placed pairs</b>                 | <b>18,105,977</b> | <b>100%</b> | <b>33,876,803</b> | <b>100%</b> | <b>9,731,726</b>  | <b>100%</b> | <b>18,748,992</b> | <b>100%</b> |
| Chimeric pairs                                    | 156,793           | 0.9%        | 706,750           | 2.1%        | 300,878           | 3.1%        | 180,757           | 1.0%        |
| inverted orientation                              | 2,320             |             | 39,193            |             | 39,927            |             | 3,493             |             |
| tandem orientation                                | 3,487             |             | 13,420            |             | 7,058             |             | 4,857             |             |
| linking 2 reference contigs                       | 99,084            |             | 596,381           |             | 229,919           |             | 155,534           |             |
| spacing >100 kb                                   | 51,902            |             | 57,756            |             | 23,974            |             | 16,873            |             |
| Spaced <30 kb or 50-100 kb                        | 865,834           | 4.8%        | 2,836,671         | 8.4%        | 391,759           | 4.0%        | 158,105           | 0.8%        |
| Pairs with correct spacing and orientation        | 17,083,349        | 94.4%       | 30,333,382        | 89.5%       | 9,039,089         | 92.9%       | 18,410,129        | 98.2%       |
| <b>Total unique pairs</b>                         | <b>1,708,254</b>  | <b>100%</b> | <b>6,956,308</b>  | <b>100%</b> | <b>4,247,777</b>  | <b>100%</b> | <b>5,866,705</b>  | <b>100%</b> |
| Unique chimeric pairs                             | 79,674            | 4.7%        | 385,992           | 5.5%        | 198,928           | 4.7%        | 140,335           | 2.4%        |
| inverted orientation                              | 736               |             | 15,085            |             | 18,883            |             | 1,705             |             |
| tandem orientation                                | 1,201             |             | 3,840             |             | 3,292             |             | 1,996             |             |
| linking 2 reference contigs                       | 51,685            |             | 340,657           |             | 161,982           |             | 125,674           |             |
| spacing >100 kb                                   | 26,052            |             | 26,410            |             | 14,771            |             | 10,960            |             |
| Unique pairs spaced 1-30 kb or 50-100 kb          | 52,727            | 3.1%        | 126,249           | 1.8%        | 80,397            | 1.9%        | 39,015            | 0.7%        |
| Unique pairs spaced <1 kb                         | 107,479           | 6.3%        | 933,693           | 13.4%       | 182,237           | 4.3%        | 55,645            | 0.9%        |
| Unique pairs with correct spacing and orientation | 1,468,374         | 86.0%       | 5,510,374         | 79.2%       | 3,786,215         | 89.1%       | 5,631,710         | 96.0%       |
| Unique pairs with correct spacing and orientation | <b>1,468,374</b>  |             | <b>6,933,573</b>  |             |                   |             | <b>5,631,710</b>  |             |

**Supplemental Table 3.** Pair-wise matrix of inline barcodes at the beginning of read pairs derived from a Fosmid library prepared by pooling aliquots of differently tagged (*SapI*-adapter-ligated), non-size selected sheared mouse DNA. Concordant read pairs are in bold type face.

|        |          |          | READ 1           |                  |                  |                  |
|--------|----------|----------|------------------|------------------|------------------|------------------|
|        | Barcode  |          | A                | B                | C                | D                |
|        | Sequence |          | AGTTGCTT         | CCAGTTAG         | CTACCAGG         | TTGAGCCT         |
| READ 2 | A        | AGTTGCTT | <b>9,004,871</b> | 13,256           | 20,704           | 19,976           |
|        | B        | CCAGTTAG | 12,346           | <b>6,442,973</b> | 15,813           | 17,305           |
|        | C        | CTACCAGG | 21,245           | 15,880           | <b>9,877,836</b> | 24,329           |
|        | D        | TTGAGCCT | 19,469           | 15,580           | 23,796           | <b>8,294,202</b> |

**Supplemental Table 4:** Structural rearrangements detected in the K-562 cell line by *Fosill* sequencing. Rearrangements were ranked by the number of supporting unique read pairs. Events supported by less than 10 unique *Fosill* jumps were not included. Seven rearrangements were translocations (chromosome pairs involved denoted under headings chr1 and chr2). Intrachromosomal events were classified as tandem duplications (n=6), deletions (n=3), inversions (n=1), or simply as “long range” (n=4) when read pairs spanned >1 Mb in the reference genome. Forward and reverse reads aligning to the same strand of the reference genome sequence (columns str1 and str2) indicates an inversion. Notable gene features on either side of the breakpoints are listed under site1 and site2.

| Read |       |                    |      |      |             |      |      |             |                          |            |                             |                                        |
|------|-------|--------------------|------|------|-------------|------|------|-------------|--------------------------|------------|-----------------------------|----------------------------------------|
| Rank | pairs | Rearrangement      | chr1 | str1 | pos1        | chr2 | str2 | pos2        | site1                    | span (bp)  | site2                       | Potential aberrant protein             |
| 1    | 887   | translocation      | 9    | 1    | 133,607,091 | 22   | 0    | 23,632,602  | Intron of <i>ABL1</i>    | N/A        | Intron of <i>BCR</i>        | Fusion: in frame (BCR-ABL1)            |
| 2    | 131   | inversion          | 9    | 0    | 131,109,854 | 9    | 0    | 131,464,347 | Intron of <i>SLC27A4</i> | 354,493    | Promoter of <i>PKN3</i>     | Antisense fusion                       |
| 3    | 130   | tandem duplication | 6    | 1    | 31,619,152  | 6    | 0    | 31,833,732  | Intron of <i>BAT3</i>    | 214,580    | Exon 14 of <i>SLC44A4</i>   | Fusion: mid-exon (BAT3-SLC44A4)        |
| 4    | 110   | tandem duplication | 16   | 1    | 88,592,357  | 16   | 0    | 88,860,888  | Intron of <i>ZFPM1</i>   | 268,531    | Intergenic                  | -                                      |
| 5    | 75    | long range         | 9    | 1    | 123,552,783 | 9    | 0    | 131,103,311 | 5'-UTR of <i>FBXW2</i>   | 7,550,528  | 5'-UTR of <i>SLC27A4</i>    | Antisense fusion                       |
| 6    | 61    | translocation      | 9    | 0    | 134,155,051 | 13   | 0    | 108,661,074 | Intergenic               | N/A        | Intergenic                  | -                                      |
| 7    | 55    | deletion           | 10   | 0    | 103,603,092 | 10   | 1    | 103,799,734 | Intron of <i>KCNIP2</i>  | 196,642    | Intron of <i>C10orf76</i>   | Fusion: out of frame (C10orf76-KCNIP2) |
| 8    | 51    | translocation      | 3    | 0    | 48,228,049  | 10   | 0    | 87,847,570  | Intron of <i>CDC25A</i>  | N/A        | Intron of <i>GRID1</i>      | -                                      |
| 9    | 36    | tandem duplication | 17   | 1    | 26,900,245  | 17   | 0    | 27,272,846  | 3'-UTR of <i>ALDOC</i>   | 372,601    | Intron of <i>PHF12</i>      | -                                      |
| 10   | 29    | deletion           | 10   | 0    | 126,639,489 | 10   | 1    | 126,731,062 | Intron of <i>ZRANB1</i>  | 91,573     | 5'-UTR of <i>CTBP2</i>      | Antisense fusion                       |
| 11   | 25    | tandem duplication | 1    | 1    | 6,452,708   | 1    | 0    | 6,617,700   | Intron of <i>ACOT7</i>   | 164,992    | Intron of <i>TAS1R1</i>     | Antisense fusion                       |
| 12   | 23    | long range         | 13   | 0    | 94,022,128  | 13   | 1    | 108,503,621 | Intron of <i>GPC6</i>    | 14,481,493 | Intron of <i>FAM155A</i>    | Antisense fusion                       |
| 13   | 22    | translocation      | 6    | 1    | 38,108,755  | 16   | 1    | 78,260,859  | Intron of <i>ZFAND3</i>  | N/A        | Intron of <i>WWOX</i>       | -                                      |
| 14   | 20    | tandem duplication | 4    | 1    | 10,106,099  | 4    | 0    | 10,329,568  | Intron of <i>WDR1</i>    | 223,469    | Intergenic                  | -                                      |
| 15   | 18    | translocation      | 9    | 0    | 134,074,293 | 22   | 0    | 17,300,213  | Exon 29 of <i>NUP214</i> | N/A        | 5'-UTR of <i>XKR3</i>       | Fusion: mid-exon (NUP214-XKR3)         |
| 16   | 15    | deletion           | 17   | 0    | 64,347,281  | 17   | 1    | 64,506,647  | Intron of <i>PRKCA</i>   | 159,366    | Intron of <i>PRKCA</i>      | Deletion of 1 exon: out of frame       |
| 17   | 11    | translocation      | 6    | 1    | 16,753,402  | 16   | 0    | 85,643,398  | 5'-UTR of <i>ATXN1</i>   | N/A        | Promoter of <i>KIAA0182</i> | Antisense fusion                       |
| 18   | 11    | long range         | 9    | 1    | 123,565,059 | 9    | 0    | 132,658,152 | Intergenic               | 9,093,093  | Exon 16 of <i>FNBP1</i>     | -                                      |
| 19   | 11    | translocation      | 9    | 0    | 139,634,410 | 23   | 1    | 63,755,308  | Exon 5 of <i>LCN10</i>   | N/A        | Intergenic                  | -                                      |
| 20   | 11    | tandem duplication | 14   | 1    | 23,217,247  | 14   | 0    | 23,806,209  | Intergenic               | 588,962    | Intergenic                  | -                                      |
| 21   | 11    | long range         | 18   | 1    | 480,258     | 18   | 1    | 3,474,872   | Intron of <i>COLEC12</i> | 2,994,614  | Intergenic                  | -                                      |

|                                   |    |    |    |    |
|-----------------------------------|----|----|----|----|
| Digestion with Nb. <i>Bbv</i> CI: | +  | +  | +  | -  |
| Nick translation time (min.):     | 45 | 55 | 65 | 55 |

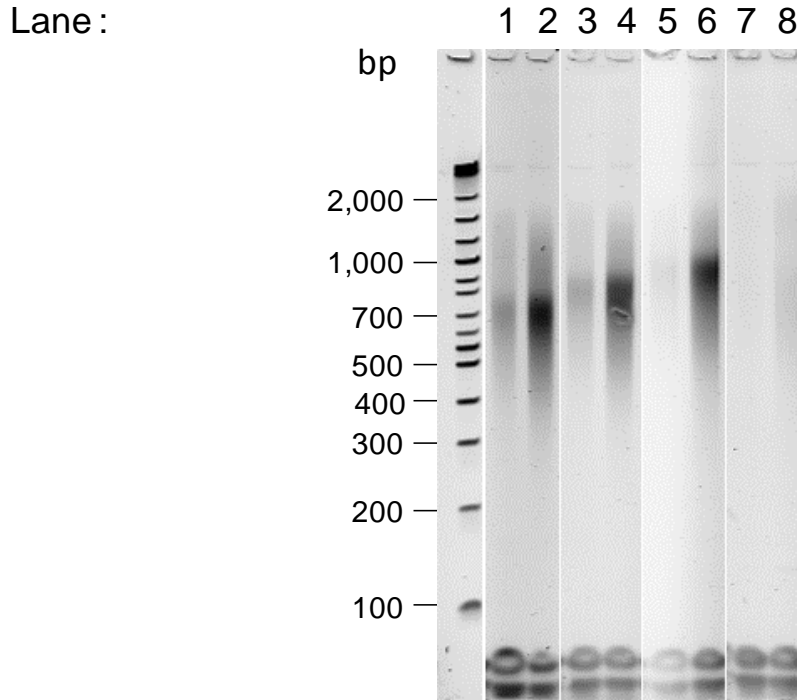

**Supplemental Figure 1.** Time course of nick translation. Fosmid DNA (mouse library M) was nicked by incubation with Nb.*Bbv*CI. A mock-nick control reaction contained Fosmid DNA but no Nb.*Bbv*CI (lanes 7 and 8). The reaction products were subjected to a nick-translation reaction at 0°C for 45, 55 or 65 min. followed by S1 digestion, end-repair and dilute ligation to circularize DNA fragments. Small-scale test inverse PCR reactions were run for 15 (lanes 1, 3, 5, 7) or 18 cycles (lanes 2, 4, 6, 8). Amplification products were analyzed on a SYBR-green-stained 5% non-denaturing polyacrylamide gel. The longer the time of nick translation, the longer the PCR products which form a long smear.

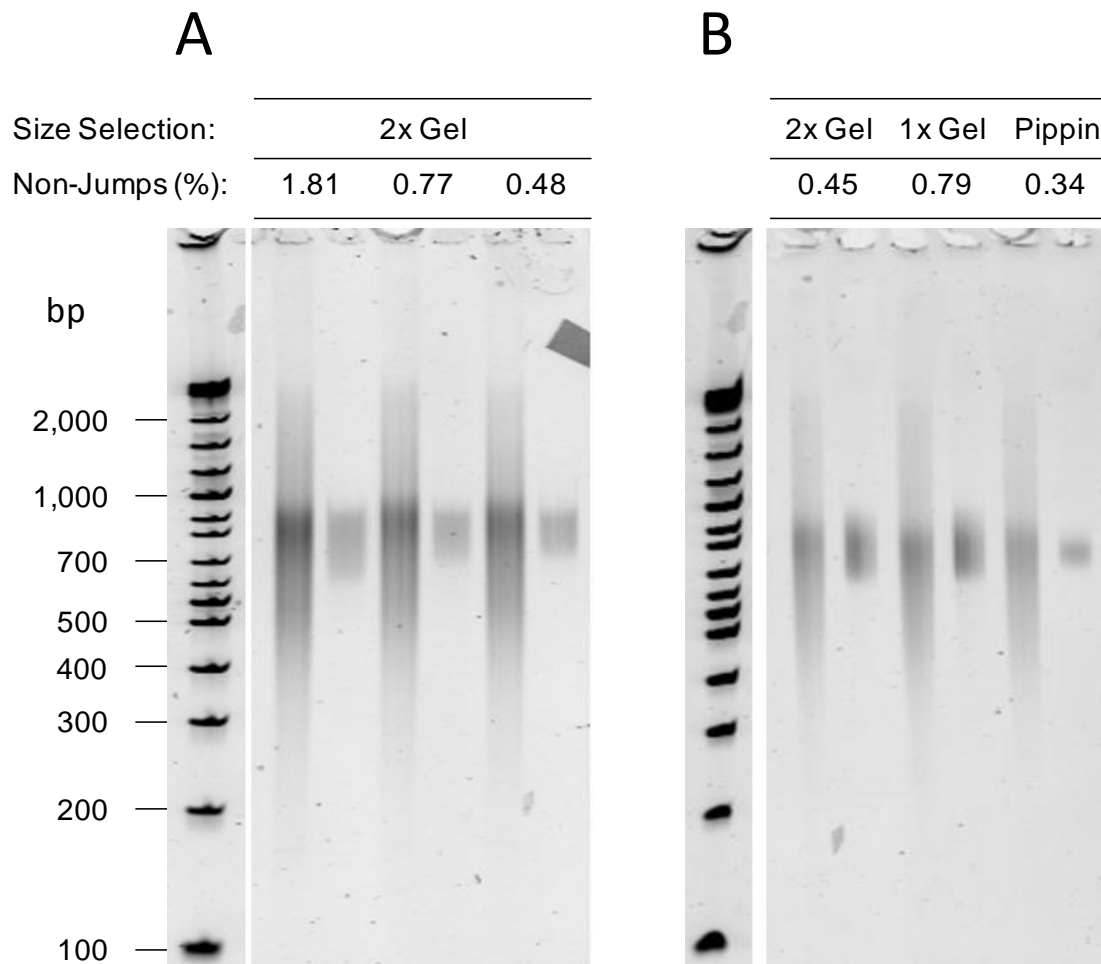

**Supplemental Figure 2:** Percent “non-jumps” in six differently size-selected *Fosill* libraries. The two SYBR-green-stained analytical 5% polyacrylamide gels show the size distribution of *Fosill* libraries before (left lane of each pair) and after electrophoretic size selection. 1x and 2x Gel indicates one and two consecutive preparative agarose gels, respectively. “Pippin” is an automated preparative gel-electrophoresis system. (A) Narrowing the size distribution by raising the lower cut-off size from about 450 to 550 bp decreased the percentage of unique “non-jumps”, *i.e.*, read-pairs spanning less than 1 kb in the human reference genome, from 1.81% to 0.48%. (B) A single narrow size selection on the Pippin instrument (right-most lane) is at least as effective as two consecutive preparative agarose gels and currently our preferred protocol.

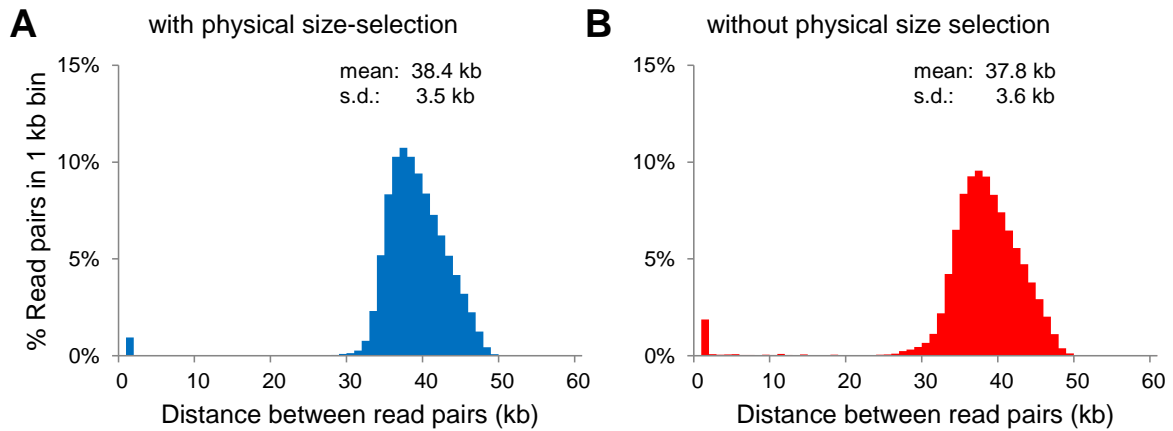

**Supplemental Figure 3:** Comparison of length-distributions of Fosill jumps derived from Fosmid libraries constructed with or without physical size selection of the sheared genomic DNA on a pulsed-field gel. Shown is the distribution of unique read pairs in mouse Fosill library M (A) and in the mouse Fosill sub-library tagged with barcode AGTTGCTT (B). The mean and standard deviation of *bona fide* Fosmid-sized jumps (30-50 kb) are indicated.





C Tandem duplication on chr 6: BAT3-SLC44A4

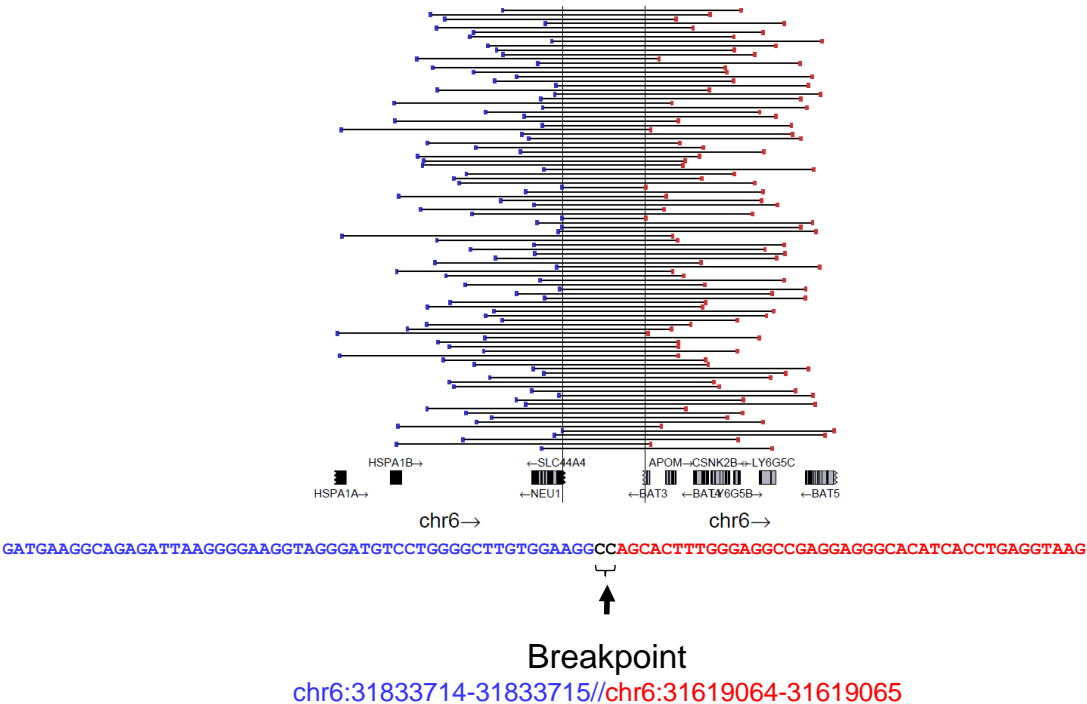

D Deletion on chr 9

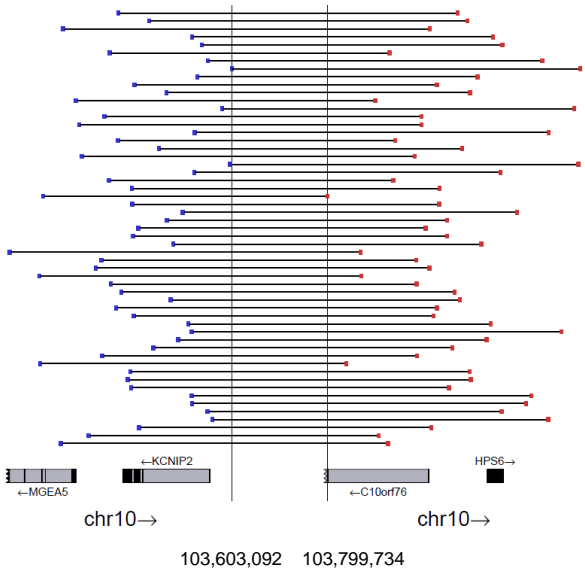

**E****Translocation (9;22): NUP214-XKR3**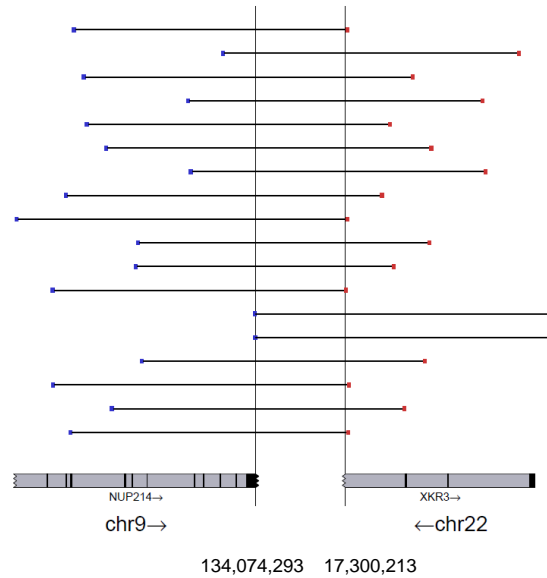

**Supplemental Figure 4.** dRanger maps showing the read pairs supporting the five structural rearrangements listed in Table 1 of the main text. (A) The t(9;22) translocation in the K-562 genome that gives rise to the *BCR-ABL* fusion gene was bracketed by a total of 887 unique *Fosill* read pairs of which only a random subset is shown. The break point itself was covered by 32 reads. One of them is shown at the bottom with sequence from chromosome 22 and chromosome 9 distinguished by blue and red type face, respectively. Due to micro homology of the two sequences involved in the translocation event, the five bases denoted in black cannot be assigned to one chromosome. (B) Shown is the map position of all 131 unique read pairs implicating an inversion on chromosome 9. No single read spanning the breakpoint could be identified in this case. The read starts of chimeric read pairs closest to the break point are indicated (chr9:131,109,854 and chr9:131,464,347). (C) A tandem duplication on chromosome 6 that gives rise to a *BAT3-SLC44A4* fusion gene (Berger et al. 2010) was framed by 130 unique read pairs. The break point was covered by 7 single reads. The micro homology between the fusion partners is 2 bp. (D) Fifty-five read pairs spanning more than 100 kb in the reference genome indicated a ~200-kb deletion on chromosome 10. (E) Twenty-two *Fosill* read pairs defined a 2<sup>nd</sup> t(9;22) translocation which gives rise to a fusion gene involving *NUP214* and *XKR3* (Levin et al. 2009; Berger et al. 2010). No single read crossing the translocation breakpoint was found.
